# Supplementary material for: Reducing Test Utilization in Hospital Settings: A Narrative Review
Source: PubMed Central journal article supplement — Ann Lab Med. 2018 May 23;38(5):402–12. doi: 10.3343/alm.2018.38.5.402 (PMC5973913; doi:10.3343/alm.2018.38.5.402), 2018-05-23
Supplement: alm-38-402-s001.pdf [file alm-38-402-s001.pdf]

## Supplemental Data 1: Search terms

Search terms and combinations thereof used to find relevant articles describing interventions aimed at reducing unnecessary laboratory testing in the hospital setting in the PubMed, Embase, and Canadian Agency for Drugs and Technologies in Health-Health Technology Assessment databases

'laboratory test\*' OR 'laboratory request\*' OR 'laboratory order\*' OR 'laboratory utilization', OR 'laboratory test utilization'

AND

'inappropriate' OR 'appropriate' OR 'reduce' OR 'reduction' OR 'improve' OR 'improving' OR 'improvement'

AND

'intervention\*' OR 'strategy' OR 'strategies' OR 'education\*' OR 'feedback'
