# Supplementary material for: Reducing Test Utilization in Hospital Settings: A Narrative Review
Source: PubMed Central journal article supplement — Ann Lab Med. 2018 May 23;38(5):402–12. doi: 10.3343/alm.2018.38.5.402 (PMC5973913; doi:10.3343/alm.2018.38.5.402), 2018-05-23
Supplement: alm-38-402-s002.pdf [file alm-38-402-s002.pdf]

Supplemental Data Table S2. Overview of individual studies

| Ref                                  | Interventions                                                                                                                          | Tests studied |      |     |      |       |    |      | Clin outcome | Adherence | Sustainability | Reproducibility |
|--------------------------------------|----------------------------------------------------------------------------------------------------------------------------------------|---------------|------|-----|------|-------|----|------|--------------|-----------|----------------|-----------------|
|                                      |                                                                                                                                        | All           | Chem | Hem | Coag | Urine | TM | Endo |              |           |                |                 |
| Education                            |                                                                                                                                        |               |      |     |      |       |    |      |              |           |                |                 |
| 8                                    | Presentations, discussions, flyers, email communication                                                                                |               | X    | X   | X    |       |    |      | Y            | N         | N              | N               |
| 28                                   | Team discussion during rounds                                                                                                          |               | X    |     |      |       |    |      | Y            | N         | N              | Y               |
| 30                                   | Implementation of a guideline                                                                                                          |               | X    |     |      |       |    |      | Y            | N         | N              | Y               |
| 32                                   | Range of educational efforts                                                                                                           |               | X    | X   | X    |       |    | X    | Y            | N         | N              | N               |
| 33                                   | Implementation of standard operating protocols                                                                                         |               |      |     |      |       |    | X    | N            | N         | N              | N               |
| 18                                   | Implementation of algorithm                                                                                                            |               | X    |     |      |       |    |      | Y            | N         | N              | N               |
| 34                                   | Implementation of guidelines                                                                                                           |               | X    |     |      |       |    |      | Y            | N         | N              | N               |
| 35                                   | Sessions on predictive value vs sessions on economic issues and cost control                                                           |               |      |     |      |       |    | X    | Y            | Y         | N              | N               |
| 36                                   | Implementation of guideline and review of medical records vs no intervention                                                           |               | X    | X   |      |       |    |      | N            | N         | N              | N               |
| C)POE                                |                                                                                                                                        |               |      |     |      |       |    |      |              |           |                |                 |
| Soft stop interventions              |                                                                                                                                        |               |      |     |      |       |    |      |              |           |                |                 |
| 39                                   | Pop-up upon ordering second ionized test within 72 hours after normal test                                                             |               | X    |     |      |       |    |      | Y            | Y         | Y              | Y               |
| 41                                   | Pop-up upon repeat order within specific time interval vs no intervention                                                              |               | X    |     |      |       |    |      | Y            | Y         | N              | Y               |
| 43                                   | Pop-up upon ordering of potentially inappropriate test                                                                                 |               | X    |     |      | X     |    |      | N            | Y         | N              | Y               |
| 45                                   | Pop-up upon ordering if previous result within same hospital stay                                                                      |               | X    |     |      |       |    |      | N            | Y         | Y              | Y               |
| 46                                   | Pop-up if most recent result is less than 90 days old                                                                                  |               |      |     |      |       | X  |      | Y            | Y         | N              | Y               |
| 47                                   | Pop-up upon potentially redundant ordering of test                                                                                     |               |      |     |      |       | X  |      | N            | Y         | Y              | Y               |
| 49                                   | Pop-up upon ordering within time specific interval vs determination of redundancy and suppression of pop-up                            |               | X    |     | X    |       |    | X    | Y            | Y         | N              | N               |
| Hard stop interventions              |                                                                                                                                        |               |      |     |      |       |    |      |              |           |                |                 |
| 19                                   | Rejection if not ordered according to order frequency rule                                                                             |               |      |     |      |       |    | X    | Y            | Y         | Y              | Y               |
| 16                                   | Rejection if ordering within minimum retesting interval or if not meeting rules                                                        |               | X    |     |      |       |    | X    | Y            | Y         | N              | Y               |
| 53                                   | Pop-up upon ordering same-day duplicate test, rejection of unnecessary order                                                           |               | X    |     |      |       |    |      | Y            | Y         | Y              | Y               |
| 55                                   | Rejection of order if previous result within 48 hours vs no intervention                                                               |               | X    |     |      |       |    |      | N            | Y         | N              | Y               |
| 57                                   | Rejection of order if requested within certain time interval after previous test                                                       |               | X    |     |      | X     | X  | X    | N            | Y         | Y              | Y               |
| Hard stop vs soft stop interventions |                                                                                                                                        |               |      |     |      |       |    |      |              |           |                |                 |
| 60                                   | Blocking of tests deemed unnecessary more than once per day vs pop-up upon ordering of tests deemed unnecessary more than once per day |               | X    |     |      |       |    |      | N            | Y         | N              | Y               |

(Continued to the next page)

Supplemental Data Table S2. Continued

| Ref | Interventions                                                                                                                                                            | Tests studied |      |     |      |       |    |      | Clin outcome | Adherence | Sustainability | Reproducibility |
|-----|--------------------------------------------------------------------------------------------------------------------------------------------------------------------------|---------------|------|-----|------|-------|----|------|--------------|-----------|----------------|-----------------|
|     |                                                                                                                                                                          | All           | Chem | Hem | Coag | Urine | TM | Endo |              |           |                |                 |
|     | Order form changes, display of fee                                                                                                                                       |               |      |     |      |       |    |      |              |           |                |                 |
| 62  | Redesign of order form through re-categorization of target test                                                                                                          |               | X    |     |      |       |    |      | N            | Y         | N              | Y               |
| 64  | Revision of test panels, reducing the number from 171 to 60                                                                                                              | X             |      |     |      |       |    |      | N            | Y         | N              | Y               |
| 66  | Display of charge and turn-around-time upon ordering test vs no intervention                                                                                             |               |      |     |      |       | X  |      | N            | Y         | N              | Y               |
| 67  | Limiting range of laboratory tests allowed to order by changing paper request form                                                                                       | X             |      |     |      |       |    |      | N            | Y         | N              | Y               |
| 69  | Display of charge upon ordering vs no intervention                                                                                                                       |               | X    | X   | X    | X     | X  | X    | N            | Y         | N              | Y               |
| 20  | Redesign of order form: removing tickbox for target test, requiring written request                                                                                      |               |      |     |      |       | X  |      | Y            | Y         | N              | Y               |
| 71  | Change in order form indicating appropriateness (overruling of recommendation by providing reason on sheet) and display of charge of tumor marker requests on order form |               |      |     |      |       | X  |      | N            | Y         | Y              | N               |
| 73  | Display of charge on order form                                                                                                                                          |               | X    | X   | X    | X     |    |      | Y            | Y         | N              | Y               |
| 74  | Redesign of order form displaying only boxes for clinical conditions instead of individual tests vs no intervention                                                      |               |      |     |      |       | X  |      | N            | N         | Y              | N               |
| 76  | Unbundling and translocation of test panels, grouping tests, implementation of algorithms                                                                                |               | X    | X   | X    | X     | X  | X    | N            | Y         | N              | N               |
| 77  | Elimination of predefined multitest panels                                                                                                                               |               | X    |     |      |       |    |      | N            | Y         | N              | N               |
| 79  | Computerized display of charge upon ordering vs no intervention                                                                                                          | X             |      |     |      |       |    |      | Y            | N         | N              | Y               |
| 80  | Change in order form indicating appropriateness of request                                                                                                               |               |      |     |      |       | X  |      | N            | Y         | N              | Y               |
|     | Time limits on orders                                                                                                                                                    |               |      |     |      |       |    |      |              |           |                |                 |
| 81  | Elimination of ability to order daily recurrent tests                                                                                                                    |               | X    | X   | X    | X     |    |      | Y            | Y         | N              | Y               |
| 83  | Expiration of any laboratory order at 24 hours                                                                                                                           |               | X    |     |      |       |    |      | N            | Y         | N              | Y               |
| 85  | Elimination of standing orders for laboratory studies                                                                                                                    |               | X    |     |      |       |    |      | Y            | N         | N              | N               |
|     | Combined (C)POE & Others                                                                                                                                                 |               |      |     |      |       |    |      |              |           |                |                 |
| 7   | Time-limit on ordering, daily order set for appraisal of tests ordered daily, patient summary tab to permit rapid review of active orders                                |               | X    | X   | X    | X     |    |      | Y            | Y         | N              | Y               |
| 88  | Implementation of inpatient electronic health record with CPOE                                                                                                           | X             |      |     |      |       |    |      | Y            | Y         | N              | N               |
| 90  | Order form change through listing organs/diagnoses which directed to the test that could be requested, changing regulations for requests                                 |               |      |     |      |       | X  |      | N            | Y         | N              | Y               |
| 92  | Time-limit on ordering, display of previous test result upon ordering, display of testing guidelines                                                                     |               | X    |     |      |       |    |      | N            | Y         | Y              | Y               |

(Continued to the next page)

Supplemental Data Table S2. Continued

| Ref                        | Interventions                                                                                                                              | Tests studied |      |     |      |       |    |      | Clin outcome | Adherence | Sustainability | Reproducibility |       |
|----------------------------|--------------------------------------------------------------------------------------------------------------------------------------------|---------------|------|-----|------|-------|----|------|--------------|-----------|----------------|-----------------|-------|
|                            |                                                                                                                                            | All           | Chem | Hem | Coag | Urine | TM | Endo |              |           |                |                 | Other |
| Others                     |                                                                                                                                            |               |      |     |      |       |    |      |              |           |                |                 |       |
| 27                         | Review of microbiology send-out test requests                                                                                              |               |      |     |      |       |    |      | X            | N         | Y              | N               | Y     |
| 29                         | Review of reference test requests before approval                                                                                          |               |      |     |      |       |    |      | X            | N         | Y              | N               | Y     |
| 31                         | Review of reference test requests                                                                                                          |               |      |     |      |       |    |      | X            | N         | Y              | N               | Y     |
| 15                         | Change of providers allowed to order tests, ordering individualized instead of through surgery-specific pathway                            | X             |      |     |      |       |    |      |              | Y         | Y              | N               | Y     |
| Education & Audit/Feedback |                                                                                                                                            |               |      |     |      |       |    |      |              |           |                |                 |       |
| 25                         | Information on charges, weekly feedback on mean volume and charges                                                                         | X             |      |     |      |       |    |      |              | N         | N              | N               | Y     |
| 24                         | Presentations and flyers on high value care principles, pocket cards with charges, weekly feedback with peer comparison vs no intervention |               | X    | X   |      |       |    |      |              | Y         | N              | N               | Y     |
| 3                          | Educational seminars on overutilization, weekly feedback reports on ordering habits                                                        |               | X    | X   | X    |       |    |      | X            | N         | N              | N               | N     |
| 37                         | Implementation of guidelines, audit and feedback method not further specified                                                              |               | X    |     |      |       |    |      |              | Y         | N              | N               | N     |
| 10                         | Implementation of guidelines, lectures on use of laboratory tests, reminder letters, feedback on test use vs no intervention               |               | X    |     |      |       |    |      | X            | N         | N              | Y               | N     |
| 38                         | Emails with recommendations on laboratory ordering, monthly feedback                                                                       |               | X    | X   |      |       |    |      |              | Y         | N              | N               | N     |
| 40                         | Education regarding indications for target test ordering, physicians informed of results of previous audit on ordering behavior            |               | X    |     |      |       |    |      |              | N         | N              | N               | N     |
| 42                         | Discussions of related literature, feedback on previous 3 years, feedback on first months after intervention                               |               | X    |     |      |       |    |      |              | N         | N              | N               | N     |
| 44                         | Guide with ordering rules and test costs, educational sessions, monthly feedback                                                           |               | X    | X   |      |       |    |      |              | Y         | N              | N               | N     |
| 9                          | Implementation of ordering guidelines, monthly update on outcome                                                                           | X             |      |     |      |       |    |      |              | Y         | Y              | N               | Y     |
| 11                         | Feedback on previous audit of appropriateness of testing, review of literature, discussion on strategies for reducing unnecessary testing  |               | X    | X   |      |       |    |      |              | Y         | Y              | N               | Y     |
| 48                         | Educational information, feedback on blood loss from phlebotomy                                                                            | X             |      |     |      |       |    |      |              | N         | N              | N               | N     |
| 50                         | Implementation of guidelines, teaching sessions, monthly feedback on adherence and impact of guidelines vs no intervention                 |               | X    |     |      |       |    |      |              | Y         | Y              | N               | N     |
| 51                         | Teaching rounds, weekly review of cost data                                                                                                |               | X    |     |      |       |    |      |              | Y         | N              | N               | N     |
| 52                         | Discussing cost issues and unnecessary testing, feedback on ordering patterns relative to peers, implementation of guidelines              |               | X    | X   | X    | X     | X  | X    |              | Y         | N              | N               | Y     |

(Continued to the next page)

Supplemental Data Table S2. Continued

| Ref                       | Interventions                                                                                                                                                           | Tests studied |      |     |      |       |    |      | Clin outcome | Adherence | Sustainability | Reproducibility |       |
|---------------------------|-------------------------------------------------------------------------------------------------------------------------------------------------------------------------|---------------|------|-----|------|-------|----|------|--------------|-----------|----------------|-----------------|-------|
|                           |                                                                                                                                                                         | All           | Chem | Hem | Coag | Urine | TM | Endo |              |           |                |                 | Other |
| Education & (C)POE        |                                                                                                                                                                         |               |      |     |      |       |    |      |              |           |                |                 |       |
| 54                        | Revision of protocols, lectures, omission of tests from standard panels, implementation of presets                                                                      | X             |      |     |      |       |    |      |              | N         | Y              | N               | N     |
| 56                        | Alert upon ordering in specific patients, education through email                                                                                                       |               |      |     |      |       |    | X    |              | N         | N              | N               | N     |
| 58                        | Implementation of guidelines, incorporation into admission templates on CPOE screen, educational sessions vs no intervention                                            | X             | X    |     |      |       |    |      |              | Y         | N              | N               | Y     |
| 59                        | Information campaign, clinical justification needed if more parameters ordered, implementation of algorithm                                                             |               |      |     |      |       |    | X    |              | N         | N              | N               | N     |
| Education & Others        |                                                                                                                                                                         |               |      |     |      |       |    |      |              |           |                |                 |       |
| 61                        | Staff education, visual reminders, daily checklists                                                                                                                     | X             | X    | X   |      |       |    |      |              | Y         | N              | N               | N     |
| 63                        | Daily information for staff, reminders at bedside of test information and costs, incentive                                                                              | X             | X    | X   | X    |       |    |      |              | Y         | N              | N               | N     |
| 65                        | One day email discussions about utility and costs of CRP testing, no CRP day with gold coin penance if ordered                                                          | X             |      |     |      |       |    |      |              | N         | N              | N               | N     |
| Audit/Feedback & (C)POE   |                                                                                                                                                                         |               |      |     |      |       |    |      |              |           |                |                 |       |
| 68                        | Implementation of computerized protocol management system, monthly summary of investigations used as basis for regular discussions                                      | X             |      |     |      |       |    |      |              | Y         | Y              | N               | Y     |
| (C)POE & Other            |                                                                                                                                                                         |               |      |     |      |       |    |      |              |           |                |                 |       |
| 70                        | Checklist enabling physicians to assess necessity for testing daily, restriction on scheduling tests to 24-hour interval                                                | X             | X    | X   | X    |       |    |      |              | Y         | N              | N               | N     |
| 72                        | Co-payment fee for nonemergent visits, reducing the number of eligible tests to order from the Emergency Department                                                     | X             |      |     |      |       |    |      |              | N         | Y              | N               | N     |
| Education, (C)POE & Other |                                                                                                                                                                         |               |      |     |      |       |    |      |              |           |                |                 |       |
| 75                        | Educational sessions, item on ICU checklist regarding routine blood tests, prompt in order system that compelled provider to specify indication for test                | X             | X    |     |      |       |    |      |              | Y         | N              | N               | Y     |
| 21                        | Implementation of guidelines, removal of tests from order set, pop-up warning upon ordering not according to specific rules, change of providers allowed to order tests | X             |      |     |      |       |    |      |              | Y         | N              | N               | Y     |
| 78                        | Implementation of protocol, rejection if request within 24 hours of previous request, consultant only requesting vs no intervention                                     | X             |      |     |      |       |    |      |              | N         | N              | N               | N     |
| 22                        | Unbundling of panels, series of lectures on economic implications of excessive use of testing, supervision of ordering by senior physician vs no intervention           | X             |      |     |      |       |    |      |              | Y         | N              | Y               | N     |

(Continued to the next page)

Supplemental Data Table S2. Continued

| Ref                                       | Interventions                                                                                                                                                                                                                                                                                                  | Tests studied |      |     |      |       |    |      | Clin outcome | Adherence | Sustainability | Reproducibility |
|-------------------------------------------|----------------------------------------------------------------------------------------------------------------------------------------------------------------------------------------------------------------------------------------------------------------------------------------------------------------|---------------|------|-----|------|-------|----|------|--------------|-----------|----------------|-----------------|
|                                           |                                                                                                                                                                                                                                                                                                                | All           | Chem | Hem | Coag | Urine | TM | Endo |              |           |                |                 |
| Education, Audit/Feedback & Other         |                                                                                                                                                                                                                                                                                                                |               |      |     |      |       |    |      |              |           |                |                 |
| 14                                        | 30-minute discussion, pocket cards with charges, discussion of laboratory tests within rounds, incentive, monthly feedback of average and individual performance vs no intervention                                                                                                                            | X             | X    | X   | X    |       |    |      | Y            | N         | N              | N               |
| 82                                        | Implementation of guidelines, discouragement of use of panel, monthly feedback on ordering volume, financial incentive                                                                                                                                                                                         | X             |      |     |      |       |    |      | Y            | N         | N              | Y               |
| 84                                        | Daily discussion of need for testing, daily coaching of resident, regular feedback on volume and costs, approval of superior needed for ordering daily tests                                                                                                                                                   | X             |      |     |      |       |    | N    | N            | N         | Y              | N               |
| 86                                        | One hour discussion, incentive, periodic feedback on performance in relation to testing goals vs one hour discussion, chart review sessions vs one hour discussion                                                                                                                                             | X             |      |     |      |       | X  | Y    | N            | N         | N              | N               |
| Education, Audit/Feedback & (C)POE        |                                                                                                                                                                                                                                                                                                                |               |      |     |      |       |    |      |              |           |                |                 |
| 87                                        | Monthly discussions and feedback, unbundling panel                                                                                                                                                                                                                                                             | X             |      |     |      |       |    | N    | N            | N         | N              | N               |
| 89                                        | Educational sessions, feedback on results of previous audit, implementation of algorithm, replacement of four-component panel with two-component panel on order form                                                                                                                                           |               |      |     | X    |       |    | Y    | N            | N         | Y              | N               |
| 91                                        | Restricting available emergency laboratory tests and allowed frequency of repeated orders, presentation on misuse of tests and restrictive strategy, feedback of results vs no intervention                                                                                                                    | X             |      |     |      |       |    | Y    | N            | N         | N              | Y               |
| Education, Audit/Feedback, (C)POE & Other |                                                                                                                                                                                                                                                                                                                |               |      |     |      |       |    |      |              |           |                |                 |
| 93                                        | Educational sessions and newsletters, quarterly feedback, elimination of standing daily orders, incentive                                                                                                                                                                                                      | X             | X    | X   | X    |       |    | Y    | N            | N         | Y              | Y               |
| 94                                        | Implementation of guidelines, educational campaign, feedback on individual provider level, removal of tests from quick-pick screen, pop-ups upon ordering specific tests, justification needed for requesting daily tests beyond 3 days, use of admission templates, discontinuing tests of limited usefulness | X             |      |     |      |       |    | N    | N            | N         | Y              | N               |

Abbreviations: Clin, clinical; Ref, reference; Chem, chemistry; Hem, hematology; Coag, coagulation; TM, tumor markers; Endo, endocrinology; Y, yes; N, no.
